# Supplementary material
Source: Elsevier journal article supplement (http://www.thebankstore.com/pdfs/mmc11.pdf)
Supplement: mmc11 [file mmc11.pdf]

# MMC MATURITY DATE CALENDAR

The maturity dates shown were based on the 91 and 182 day basis excluding the initial day as 24 hour period. The second row of numbers indicates the date for the 91 day maturity dates. The third row indicates the dates for 182 day maturity dates.

**Texas Bankers Association**

203 W. 10th St.  
Austin, TX 78701  
512/472-8388  
Fax 512/473-2560

| JULY 2011                  |                            |                            |                            |                            |                            |                            |
|----------------------------|----------------------------|----------------------------|----------------------------|----------------------------|----------------------------|----------------------------|
| SUN                        | MON                        | TUES                       | WED                        | THUR                       | FRI                        | SAT                        |
|                            |                            |                            |                            |                            | <b>1</b><br>9-30<br>12-30  | <b>2</b><br>10-1<br>12-31  |
| <b>3</b><br>10-2<br>1-1    | <b>4</b><br>10-3<br>1-2    | <b>5</b><br>10-4<br>1-3    | <b>6</b><br>10-5<br>1-4    | <b>7</b><br>10-6<br>1-5    | <b>8</b><br>10-7<br>1-6    | <b>9</b><br>10-8<br>1-7    |
| <b>10</b><br>10-9<br>1-8   | <b>11</b><br>10-10<br>1-9  | <b>12</b><br>10-11<br>1-10 | <b>13</b><br>10-12<br>1-11 | <b>14</b><br>10-13<br>1-12 | <b>15</b><br>10-14<br>1-13 | <b>16</b><br>10-15<br>1-14 |
| <b>17</b><br>10-16<br>1-15 | <b>18</b><br>10-17<br>1-16 | <b>19</b><br>10-18<br>1-17 | <b>20</b><br>10-19<br>1-18 | <b>21</b><br>10-20<br>1-19 | <b>22</b><br>10-21<br>1-20 | <b>23</b><br>10-22<br>1-21 |
| <b>24</b><br>10-23<br>1-22 | <b>25</b><br>10-24<br>1-23 | <b>26</b><br>10-25<br>1-24 | <b>27</b><br>10-26<br>1-25 | <b>28</b><br>10-27<br>1-26 | <b>29</b><br>10-28<br>1-27 | <b>30</b><br>10-29<br>1-28 |
| <b>31</b><br>10-30<br>1-29 |                            |                            |                            |                            |                            |                            |

| AUGUST 2011                |                            |                            |                            |                            |                            |                            |
|----------------------------|----------------------------|----------------------------|----------------------------|----------------------------|----------------------------|----------------------------|
| SUN                        | MON                        | TUES                       | WED                        | THUR                       | FRI                        | SAT                        |
|                            | <b>1</b><br>10-31<br>1-30  | <b>2</b><br>11-1<br>1-31   | <b>3</b><br>11-2<br>2-1    | <b>4</b><br>11-3<br>2-2    | <b>5</b><br>11-4<br>2-3    | <b>6</b><br>11-5<br>2-4    |
| <b>7</b><br>11-6<br>2-5    | <b>8</b><br>11-7<br>2-6    | <b>9</b><br>11-8<br>2-7    | <b>10</b><br>11-9<br>2-8   | <b>11</b><br>11-10<br>2-9  | <b>12</b><br>11-11<br>2-10 | <b>13</b><br>11-12<br>2-11 |
| <b>14</b><br>11-13<br>2-12 | <b>15</b><br>11-14<br>2-13 | <b>16</b><br>11-15<br>2-14 | <b>17</b><br>11-16<br>2-15 | <b>18</b><br>11-17<br>2-16 | <b>19</b><br>11-18<br>2-17 | <b>20</b><br>11-19<br>2-18 |
| <b>21</b><br>11-20<br>2-19 | <b>22</b><br>11-21<br>2-20 | <b>23</b><br>11-22<br>2-21 | <b>24</b><br>11-23<br>2-22 | <b>25</b><br>11-24<br>2-23 | <b>26</b><br>11-25<br>2-24 | <b>27</b><br>11-26<br>2-25 |
| <b>28</b><br>11-27<br>2-26 | <b>29</b><br>11-28<br>2-27 | <b>30</b><br>11-29<br>2-28 | <b>31</b><br>11-30<br>2-29 |                            |                            |                            |

| SEPTEMBER 2011             |                            |                            |                            |                            |                            |                            |
|----------------------------|----------------------------|----------------------------|----------------------------|----------------------------|----------------------------|----------------------------|
| SUN                        | MON                        | TUES                       | WED                        | THUR                       | FRI                        | SAT                        |
|                            |                            |                            |                            | <b>1</b><br>12-1<br>3-1    | <b>2</b><br>12-2<br>3-2    | <b>3</b><br>12-3<br>3-3    |
| <b>4</b><br>12-4<br>3-4    | <b>5</b><br>12-5<br>3-5    | <b>6</b><br>12-6<br>3-6    | <b>7</b><br>12-7<br>3-7    | <b>8</b><br>12-8<br>3-8    | <b>9</b><br>12-9<br>3-9    | <b>10</b><br>12-10<br>3-10 |
| <b>11</b><br>12-11<br>3-11 | <b>12</b><br>12-12<br>3-12 | <b>13</b><br>12-13<br>3-13 | <b>14</b><br>12-14<br>3-14 | <b>15</b><br>12-15<br>3-15 | <b>16</b><br>12-16<br>3-16 | <b>17</b><br>12-17<br>3-17 |
| <b>18</b><br>12-18<br>3-18 | <b>19</b><br>12-19<br>3-19 | <b>20</b><br>12-20<br>3-20 | <b>21</b><br>12-21<br>3-21 | <b>22</b><br>12-22<br>3-22 | <b>23</b><br>12-23<br>3-23 | <b>24</b><br>12-24<br>3-24 |
| <b>25</b><br>12-25<br>3-25 | <b>26</b><br>12-26<br>3-26 | <b>27</b><br>12-27<br>3-27 | <b>28</b><br>12-28<br>3-28 | <b>29</b><br>12-29<br>3-29 | <b>30</b><br>12-30<br>3-30 |                            |

| OCTOBER 2011              |                           |                           |                           |                           |                           |                           |
|---------------------------|---------------------------|---------------------------|---------------------------|---------------------------|---------------------------|---------------------------|
| SUN                       | MON                       | TUES                      | WED                       | THUR                      | FRI                       | SAT                       |
|                           |                           |                           |                           |                           |                           | <b>1</b><br>12-31<br>3-31 |
| <b>2</b><br>1-1<br>4-1    | <b>3</b><br>1-2<br>4-2    | <b>4</b><br>1-3<br>4-3    | <b>5</b><br>1-4<br>4-4    | <b>6</b><br>1-5<br>4-5    | <b>7</b><br>1-6<br>4-6    | <b>8</b><br>1-7<br>4-7    |
| <b>9</b><br>1-8<br>4-8    | <b>10</b><br>1-9<br>4-9   | <b>11</b><br>1-10<br>4-10 | <b>12</b><br>1-11<br>4-11 | <b>13</b><br>1-12<br>4-12 | <b>14</b><br>1-13<br>4-13 | <b>15</b><br>1-14<br>4-14 |
| <b>16</b><br>1-15<br>4-15 | <b>17</b><br>1-16<br>4-16 | <b>18</b><br>1-17<br>4-17 | <b>19</b><br>1-18<br>4-18 | <b>20</b><br>1-19<br>4-19 | <b>21</b><br>1-20<br>4-20 | <b>22</b><br>1-21<br>4-21 |
| <b>23</b><br>1-22<br>4-22 | <b>24</b><br>1-23<br>4-23 | <b>25</b><br>1-24<br>4-24 | <b>26</b><br>1-25<br>4-25 | <b>27</b><br>1-26<br>4-26 | <b>28</b><br>1-27<br>4-27 | <b>29</b><br>1-28<br>4-28 |
| <b>30</b><br>1-29<br>4-29 | <b>31</b><br>1-30<br>4-30 |                           |                           |                           |                           |                           |

| NOVEMBER 2011             |                           |                           |                           |                           |                           |                           |
|---------------------------|---------------------------|---------------------------|---------------------------|---------------------------|---------------------------|---------------------------|
| SUN                       | MON                       | TUES                      | WED                       | THUR                      | FRI                       | SAT                       |
|                           |                           | <b>1</b><br>1-31<br>5-1   | <b>2</b><br>2-1<br>5-2    | <b>3</b><br>2-2<br>5-3    | <b>4</b><br>2-3<br>5-4    | <b>5</b><br>2-4<br>5-5    |
| <b>6</b><br>2-5<br>5-6    | <b>7</b><br>2-6<br>5-7    | <b>8</b><br>2-7<br>5-8    | <b>9</b><br>2-8<br>5-9    | <b>10</b><br>2-9<br>5-10  | <b>11</b><br>2-10<br>5-11 | <b>12</b><br>2-11<br>5-12 |
| <b>13</b><br>2-12<br>5-13 | <b>14</b><br>2-13<br>5-14 | <b>15</b><br>2-14<br>5-15 | <b>16</b><br>2-15<br>5-16 | <b>17</b><br>2-16<br>5-17 | <b>18</b><br>2-17<br>5-18 | <b>19</b><br>2-18<br>5-19 |
| <b>20</b><br>2-19<br>5-20 | <b>21</b><br>2-20<br>5-21 | <b>22</b><br>2-21<br>5-22 | <b>23</b><br>2-22<br>5-23 | <b>24</b><br>2-23<br>5-24 | <b>25</b><br>2-24<br>5-25 | <b>26</b><br>2-25<br>5-26 |
| <b>27</b><br>2-26<br>5-27 | <b>28</b><br>2-27<br>5-28 | <b>29</b><br>2-28<br>5-29 | <b>30</b><br>2-29<br>5-30 |                           |                           |                           |

| DECEMBER 2011             |                           |                           |                           |                           |                           |                           |
|---------------------------|---------------------------|---------------------------|---------------------------|---------------------------|---------------------------|---------------------------|
| SUN                       | MON                       | TUES                      | WED                       | THUR                      | FRI                       | SAT                       |
|                           |                           |                           |                           | <b>1</b><br>3-1<br>6-1    | <b>2</b><br>3-2<br>6-1    | <b>3</b><br>3-3<br>6-2    |
| <b>4</b><br>3-4<br>6-3    | <b>5</b><br>3-5<br>6-4    | <b>6</b><br>3-6<br>6-5    | <b>7</b><br>3-7<br>6-6    | <b>8</b><br>3-8<br>6-7    | <b>9</b><br>3-9<br>6-8    | <b>10</b><br>3-10<br>6-9  |
| <b>11</b><br>3-11<br>6-10 | <b>12</b><br>3-12<br>6-11 | <b>13</b><br>3-13<br>6-12 | <b>14</b><br>3-14<br>6-13 | <b>15</b><br>3-15<br>6-14 | <b>16</b><br>3-16<br>6-15 | <b>17</b><br>3-17<br>6-16 |
| <b>18</b><br>3-18<br>6-17 | <b>19</b><br>3-19<br>6-18 | <b>20</b><br>3-20<br>6-19 | <b>21</b><br>3-21<br>6-20 | <b>22</b><br>3-22<br>6-21 | <b>23</b><br>3-23<br>6-22 | <b>24</b><br>3-24<br>6-23 |
| <b>25</b><br>3-25<br>6-24 | <b>26</b><br>3-26<br>6-25 | <b>27</b><br>3-27<br>6-26 | <b>28</b><br>3-28<br>6-27 | <b>29</b><br>3-29<br>6-28 | <b>30</b><br>3-30<br>6-29 | <b>31</b><br>3-31<br>6-30 |

# MMC MATURITY DATE CALENDAR

The maturity dates shown were based on the 91 and 182 day basis excluding the initial day as 24 hour period. The second row of numbers indicates the date for the 91 day maturity dates. The third row indicates the dates for 182 day maturity dates.

**Texas Bankers Association**

203 W. 10th St.  
Austin, TX 78701  
512/472-8388  
Fax 512/473-2560

| JANUARY 2012              |                           |                           |                           |                           |                           |                           |
|---------------------------|---------------------------|---------------------------|---------------------------|---------------------------|---------------------------|---------------------------|
| SUN                       | MON                       | TUES                      | WED                       | THUR                      | FRI                       | SAT                       |
| <b>1</b><br>4-1<br>7-1    | <b>2</b><br>4-2<br>7-2    | <b>3</b><br>4-3<br>7-3    | <b>4</b><br>4-4<br>7-4    | <b>5</b><br>4-5<br>7-5    | <b>6</b><br>4-6<br>7-6    | <b>7</b><br>4-7<br>7-7    |
| <b>8</b><br>4-8<br>7-8    | <b>9</b><br>4-9<br>7-9    | <b>10</b><br>4-10<br>7-10 | <b>11</b><br>4-11<br>7-11 | <b>12</b><br>4-12<br>7-12 | <b>13</b><br>4-13<br>7-13 | <b>14</b><br>4-14<br>7-14 |
| <b>15</b><br>4-15<br>7-15 | <b>16</b><br>4-16<br>7-16 | <b>17</b><br>4-17<br>7-17 | <b>18</b><br>4-18<br>7-18 | <b>19</b><br>4-19<br>7-19 | <b>20</b><br>4-20<br>7-20 | <b>21</b><br>4-21<br>7-21 |
| <b>22</b><br>4-22<br>7-22 | <b>23</b><br>4-23<br>7-23 | <b>24</b><br>4-24<br>7-24 | <b>25</b><br>4-25<br>7-25 | <b>26</b><br>4-26<br>7-26 | <b>27</b><br>4-27<br>7-27 | <b>28</b><br>4-28<br>7-28 |
| <b>29</b><br>4-29<br>7-29 | <b>30</b><br>4-30<br>7-30 | <b>31</b><br>5-1<br>7-31  |                           |                           |                           |                           |

| FEBRUARY 2012             |                           |                           |                           |                           |                           |                           |
|---------------------------|---------------------------|---------------------------|---------------------------|---------------------------|---------------------------|---------------------------|
| SUN                       | MON                       | TUES                      | WED                       | THUR                      | FRI                       | SAT                       |
|                           |                           |                           | <b>1</b><br>5-2<br>8-1    | <b>2</b><br>5-3<br>8-2    | <b>3</b><br>5-4<br>8-3    | <b>4</b><br>5-5<br>8-4    |
| <b>5</b><br>5-6<br>8-5    | <b>6</b><br>5-7<br>8-6    | <b>7</b><br>5-8<br>8-7    | <b>8</b><br>5-9<br>8-8    | <b>9</b><br>5-10<br>8-9   | <b>10</b><br>5-11<br>8-10 | <b>11</b><br>5-12<br>8-11 |
| <b>12</b><br>5-13<br>8-12 | <b>13</b><br>5-14<br>8-13 | <b>14</b><br>5-15<br>8-14 | <b>15</b><br>5-16<br>8-15 | <b>16</b><br>5-17<br>8-16 | <b>17</b><br>5-18<br>8-17 | <b>18</b><br>5-19<br>8-18 |
| <b>19</b><br>5-20<br>8-19 | <b>20</b><br>5-21<br>8-20 | <b>21</b><br>5-22<br>8-21 | <b>22</b><br>5-23<br>8-22 | <b>23</b><br>5-24<br>8-23 | <b>24</b><br>5-25<br>8-24 | <b>25</b><br>5-26<br>8-25 |
| <b>26</b><br>5-27<br>8-26 | <b>27</b><br>5-28<br>8-27 | <b>28</b><br>5-29<br>8-28 | <b>29</b><br>5-30<br>8-29 |                           |                           |                           |

| MARCH 2012                |                           |                           |                           |                           |                           |                           |
|---------------------------|---------------------------|---------------------------|---------------------------|---------------------------|---------------------------|---------------------------|
| SUN                       | MON                       | TUES                      | WED                       | THUR                      | FRI                       | SAT                       |
|                           |                           |                           |                           | <b>1</b><br>5-31<br>8-30  | <b>2</b><br>6-1<br>8-31   | <b>3</b><br>6-2<br>9-1    |
| <b>4</b><br>6-3<br>9-2    | <b>5</b><br>6-4<br>9-3    | <b>6</b><br>6-5<br>9-4    | <b>7</b><br>6-6<br>9-5    | <b>8</b><br>6-7<br>9-6    | <b>9</b><br>6-8<br>9-7    | <b>10</b><br>6-9<br>9-8   |
| <b>11</b><br>6-10<br>9-9  | <b>12</b><br>6-11<br>9-10 | <b>13</b><br>6-12<br>9-11 | <b>14</b><br>6-13<br>9-12 | <b>15</b><br>6-14<br>9-13 | <b>16</b><br>6-15<br>9-14 | <b>17</b><br>6-16<br>9-15 |
| <b>18</b><br>6-17<br>9-16 | <b>19</b><br>6-18<br>9-17 | <b>20</b><br>6-19<br>9-18 | <b>21</b><br>6-20<br>9-19 | <b>22</b><br>6-21<br>9-20 | <b>23</b><br>6-22<br>9-21 | <b>24</b><br>6-23<br>9-22 |
| <b>25</b><br>6-24<br>9-23 | <b>26</b><br>6-25<br>9-24 | <b>27</b><br>6-26<br>9-25 | <b>28</b><br>6-27<br>9-26 | <b>29</b><br>6-28<br>9-27 | <b>30</b><br>6-29<br>9-28 | <b>31</b><br>6-30<br>9-29 |

| APRIL 2012                 |                            |                            |                            |                            |                            |                            |
|----------------------------|----------------------------|----------------------------|----------------------------|----------------------------|----------------------------|----------------------------|
| SUN                        | MON                        | TUES                       | WED                        | THUR                       | FRI                        | SAT                        |
| <b>1</b><br>7-1<br>9-30    | <b>2</b><br>7-2<br>10-1    | <b>3</b><br>7-3<br>10-2    | <b>4</b><br>7-4<br>10-3    | <b>5</b><br>7-5<br>10-4    | <b>6</b><br>7-6<br>10-5    | <b>7</b><br>7-7<br>10-6    |
| <b>8</b><br>7-8<br>10-7    | <b>9</b><br>7-9<br>10-8    | <b>10</b><br>7-10<br>10-9  | <b>11</b><br>7-11<br>10-10 | <b>12</b><br>7-12<br>10-11 | <b>13</b><br>7-13<br>10-12 | <b>14</b><br>7-14<br>10-13 |
| <b>15</b><br>7-15<br>10-14 | <b>16</b><br>7-16<br>10-15 | <b>17</b><br>7-17<br>10-16 | <b>18</b><br>7-18<br>10-17 | <b>19</b><br>7-19<br>10-18 | <b>20</b><br>7-20<br>10-19 | <b>21</b><br>7-21<br>10-20 |
| <b>22</b><br>7-22<br>10-21 | <b>23</b><br>7-23<br>10-22 | <b>24</b><br>7-24<br>10-23 | <b>25</b><br>7-25<br>10-24 | <b>26</b><br>7-26<br>10-25 | <b>27</b><br>7-27<br>10-26 | <b>28</b><br>7-28<br>10-27 |
| <b>29</b><br>7-29<br>10-28 | <b>30</b><br>7-30<br>10-29 |                            |                            |                            |                            |                            |

| MAY 2012                   |                            |                            |                            |                            |                            |                            |
|----------------------------|----------------------------|----------------------------|----------------------------|----------------------------|----------------------------|----------------------------|
| SUN                        | MON                        | TUES                       | WED                        | THUR                       | FRI                        | SAT                        |
|                            |                            | <b>1</b><br>7-31<br>10-30  | <b>2</b><br>8-1<br>10-31   | <b>3</b><br>8-2<br>11-1    | <b>4</b><br>8-3<br>11-2    | <b>5</b><br>8-4<br>11-3    |
| <b>6</b><br>8-5<br>11-4    | <b>7</b><br>8-6<br>11-5    | <b>8</b><br>8-7<br>11-6    | <b>9</b><br>8-8<br>11-7    | <b>10</b><br>8-9<br>11-8   | <b>11</b><br>8-10<br>11-9  | <b>12</b><br>8-11<br>11-10 |
| <b>13</b><br>8-12<br>11-11 | <b>14</b><br>8-13<br>11-12 | <b>15</b><br>8-14<br>11-13 | <b>16</b><br>8-15<br>11-14 | <b>17</b><br>8-16<br>11-15 | <b>18</b><br>8-17<br>11-16 | <b>19</b><br>8-18<br>11-17 |
| <b>20</b><br>8-19<br>11-18 | <b>21</b><br>8-20<br>11-19 | <b>22</b><br>8-21<br>11-20 | <b>23</b><br>8-22<br>11-21 | <b>24</b><br>8-23<br>11-22 | <b>25</b><br>8-24<br>11-23 | <b>26</b><br>8-25<br>11-24 |
| <b>27</b><br>8-26<br>11-25 | <b>28</b><br>8-27<br>11-26 | <b>29</b><br>8-28<br>11-27 | <b>30</b><br>8-29<br>11-28 | <b>31</b><br>8-30<br>11-29 |                            |                            |

| JUNE 2012                  |                            |                            |                            |                            |                            |                            |
|----------------------------|----------------------------|----------------------------|----------------------------|----------------------------|----------------------------|----------------------------|
| SUN                        | MON                        | TUES                       | WED                        | THUR                       | FRI                        | SAT                        |
|                            |                            |                            |                            |                            | <b>1</b><br>8-31<br>11-30  | <b>2</b><br>9-1<br>12-1    |
| <b>3</b><br>9-2<br>12-2    | <b>4</b><br>9-3<br>12-3    | <b>5</b><br>9-4<br>12-4    | <b>6</b><br>9-5<br>12-5    | <b>7</b><br>9-6<br>12-6    | <b>8</b><br>9-7<br>12-7    | <b>9</b><br>9-8<br>12-8    |
| <b>10</b><br>9-9<br>12-9   | <b>11</b><br>9-10<br>12-10 | <b>12</b><br>9-11<br>12-11 | <b>13</b><br>9-12<br>12-12 | <b>14</b><br>9-13<br>12-13 | <b>15</b><br>9-14<br>12-14 | <b>16</b><br>9-15<br>12-15 |
| <b>17</b><br>9-16<br>12-16 | <b>18</b><br>9-17<br>12-17 | <b>19</b><br>9-18<br>12-18 | <b>20</b><br>9-19<br>12-19 | <b>21</b><br>9-20<br>12-20 | <b>22</b><br>9-21<br>12-21 | <b>23</b><br>9-22<br>12-22 |
| <b>24</b><br>9-23<br>12-23 | <b>25</b><br>9-24<br>12-24 | <b>26</b><br>9-25<br>12-25 | <b>27</b><br>9-26<br>12-26 | <b>28</b><br>9-27<br>12-27 | <b>29</b><br>9-28<br>12-28 | <b>30</b><br>9-29<br>12-29 |
